# Supplementary material
Source: PubMed Central journal article supplement (PMC3615711)
Supplement: NIHMS449110-supplement-Supplementary_Fig__1.pdf [file NIHMS449110-supplement-Supplementary_Fig__1.pdf]

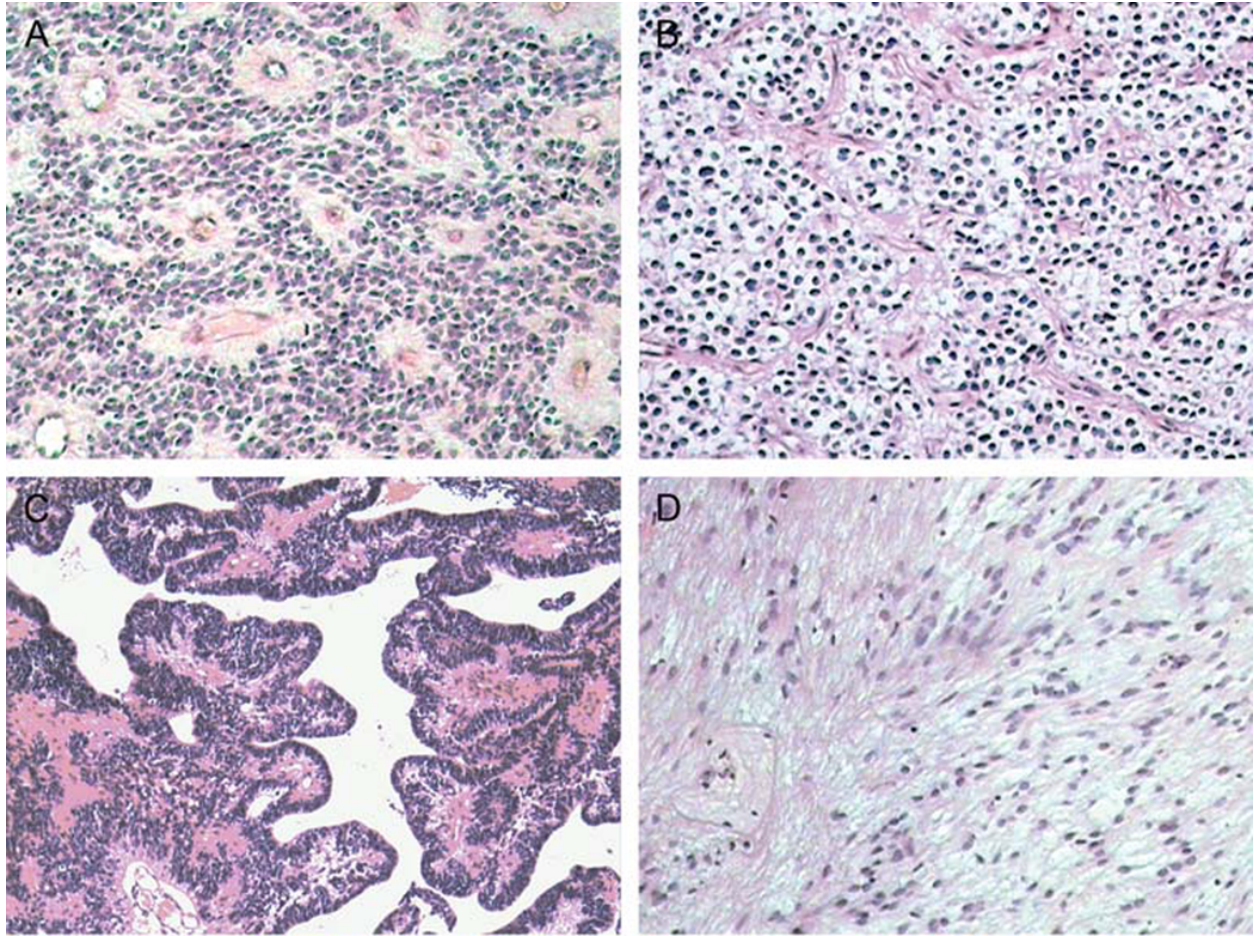

Supplementary Figure. Histological classifications of World Health Organization grade 2 ependymomas showing hematoxylin and eosin stained sections of: (A) cellular; (B) clear cell; (C) papillary; and (D) tancytic variations (A, B, D  $\times 200$ ; C,  $\times 100$ ). From<sup>1</sup> Andreiuolo F, Puget S, Peyre M, et al. Neuronal differentiation distinguishes supratentorial and infratentorial childhood ependymomas. *Neuro Oncol.* 2010;12(11):1126–1134. By permission of Oxford University Press.
